# Supplementary material for: Carbon nanobowl supported chemically functionalized PtRh nanocrystals: a highly active and methanol tolerant electrocatalyst towards the oxygen reduction reaction
Source: Royal Society of Chemistry journal article supplement (doi:10.1039/d1ta08009a), 2021-01-01
Supplement: d1ta08009a1.pdf [file d1ta08009a1.pdf]

## Electronic Supplementary Information

### **Carbon nanobowls supported chemical functionalized PtRh nanocrystals: A highly active and methanol tolerant electrocatalyst towards oxygen reduction reaction**

Ze-Nong Zhang,<sup>a</sup> Bo-Qiang Miao,<sup>b</sup> Zhu-Qing Wu,<sup>a</sup> Pei Chen,<sup>b</sup> Xue Xiao,<sup>\*c</sup> Shu-Ni Li,<sup>\*a</sup> and Yu Chen<sup>b</sup>

<sup>a</sup> Key Laboratory of Macromolecular Science of Shaanxi Province, School of Chemistry and Chemical Engineering, Shaanxi Normal University, Xi'an 710062, PR China.

<sup>b</sup> School of Materials Science and Engineering, Shaanxi Normal University, Xi'an 710062, PR China.

<sup>c</sup> Centre for Translational Atomaterials, School of Science, Computing and Engineering Technologies, Swinburne University of Technology, Hawthorn, VIC 3122, Australia.

\* Corresponding authors

E-mails: [lishuni@snnu.edu.cn](mailto:lishuni@snnu.edu.cn) (S. Li); [tiffanyxx110@gmail.com](mailto:tiffanyxx110@gmail.com) (X. Xiao)

### The preparation of working electrode

The electrocatalyst covered glassy carbon working electrode was prepared according to the previously reported procedure.<sup>1, 2</sup> Briefly, the electrocatalyst suspension was achieved by ultrasonic mixing 8 mg of electrocatalyst and 4 mL of isopropanol/Nafion<sup>®</sup> solution (20% isopropanol and 0.02% Nafion<sup>®</sup>) for 1 h. Then, 10  $\mu\text{L}$  of electrocatalyst ink was drop-coated on a clean glassy carbon electrode and dried at room temperature. Finally, the working electrode was put in an electrochemical cell containing 0.5 M  $\text{H}_2\text{SO}_4$  electrolyte for electrochemical measurement.

### Measurement of ECSA

The ECSA value of electrocatalyst was achieved from equation 1 by integrating H desorption charge.

$$ECSA = \frac{Q}{m \times C} \quad (1)$$

where  $Q$  was the charge in the H desorption region at CV curve,  $m$  was the noble metal loading amount on the working electrode, and  $C$  ( $210 \mu\text{C cm}^{-2}$ ) was monolayer hydrogen adsorption charge on noble metal surface.<sup>1, 2</sup>

### Calculation of ORR kinetic parameters

Based on the ORR polarization curves, the kinetic current density ( $i_k$ ) of ORR at electrocatalyst was calculated using Koutecky-Levich equation (eq. 2).

$$\begin{aligned} \frac{1}{i} &= \frac{1}{i_k} + \frac{1}{i_d} \\ &= \frac{1}{i_k} + \frac{1}{\omega B^{1/2}} \\ &= \frac{1}{i_k} + \frac{1}{0.62nFA_{geo}D^{2/3}B^{1/2}\nu^{-1/6}C_{O_2}} \end{aligned} \quad (2)$$

where  $i$  was the measured ORR current density,  $i_k$  was the kinetic current density,  $i_d$  was the ORR diffusion limited current density,  $B$  was a constant (*i.e.*, Levich slope), and  $\omega$  was the rotation rate,  $n$  was electron transfer number,  $F$  was the Faraday constant,  $A_{geo}$  was the geometric surface area of working electrode,  $D$  was the diffusion coefficient of  $\text{O}_2$  molecule,  $\nu$  was the kinematic viscosity of electrolyte, and  $C_{\text{O}_2}$  was the concentration of  $\text{O}_2$  in electrolyte. Meanwhile, the ORR electron transfer number ( $n$ ) could be determined from Levich slope ( $B$ ).

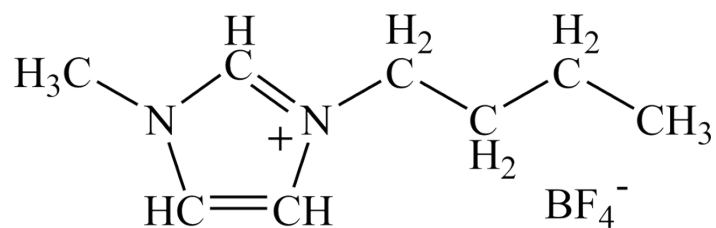

**Scheme S1.** The structure of BmimBF<sub>4</sub>.

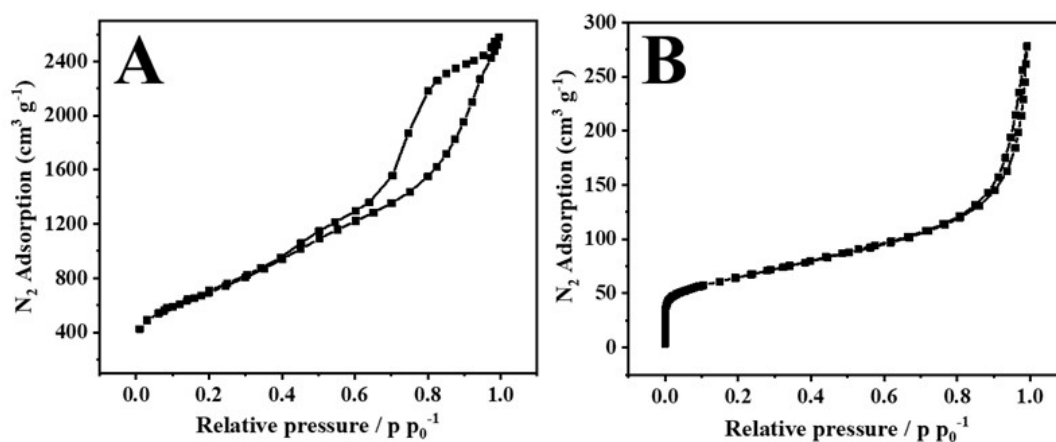

**Figure S1.** N<sub>2</sub> adsorption–desorption isotherms of (A) carbon nanobowls and (B) Vulcan XC-72.

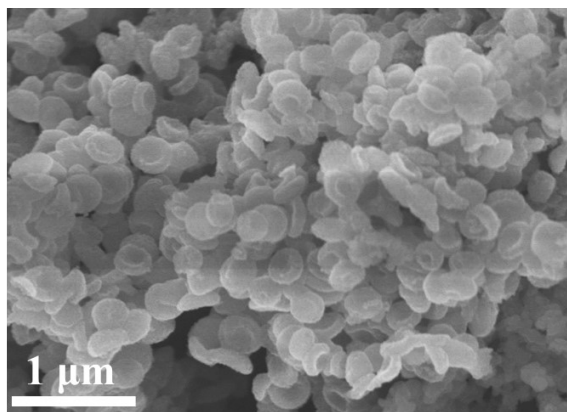

**Figure S2.** SEM image of Pt<sub>1</sub>Rh<sub>1</sub>@BmimBF<sub>4</sub>/CNBs nanohybrids.

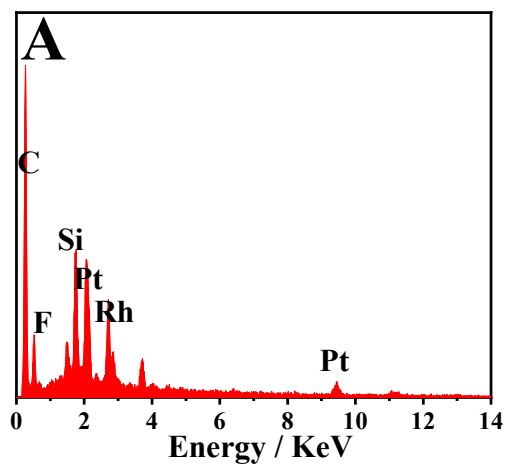

**Figure S3.** EDX pattern of  $Pt_1Rh_1@BmimBF_4/CNBs$  nano hybrids. Herein, the strong Si signal comes from Si substrate.

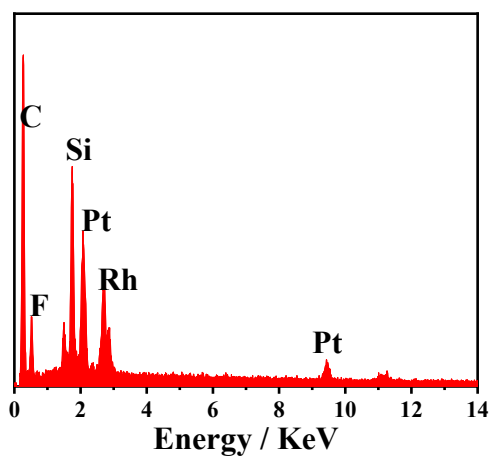

**Figure S4.** SEM-EDX elemental maps mixed  $BmimBF_4-Pt^{II}+BmimBF_4-Rh^{III}$  complex precipitates.-

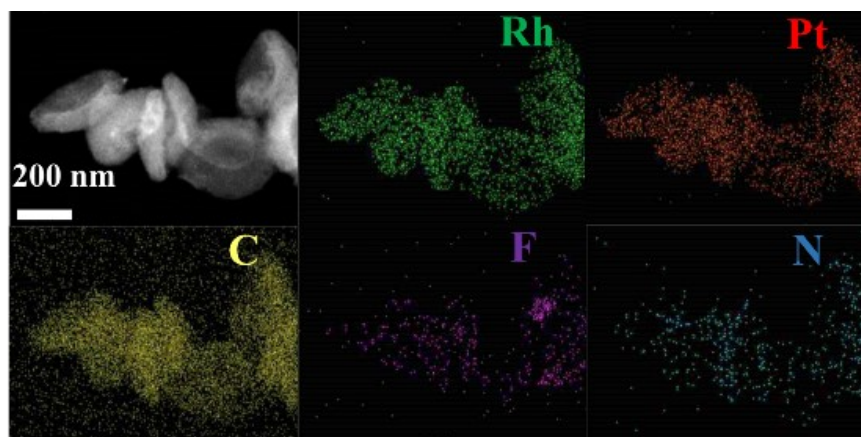

**Figure S5.** HAADF-STEM and EDX elemental maps of  $Pt_1Rh_1@BmimBF_4/CNBs$ .

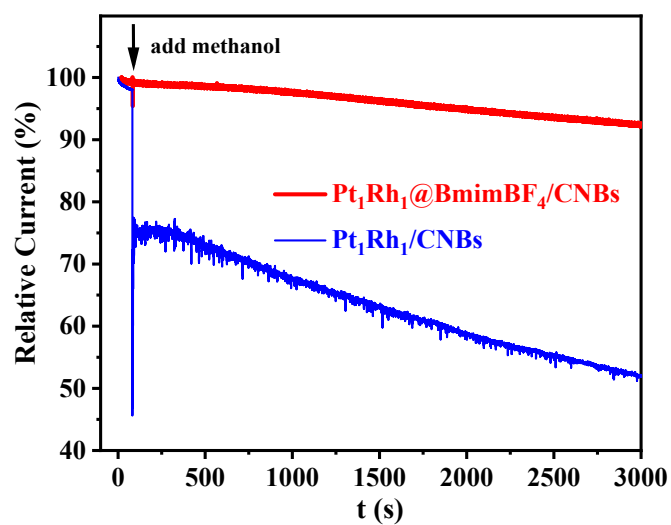

**Figure S6.** I-t curves of  $\text{Pt}_1\text{Rh}_1@\text{BmimBF}_4/\text{CNBs}$  and  $\text{Pt}_1\text{Rh}_1/\text{CNBs}$ .

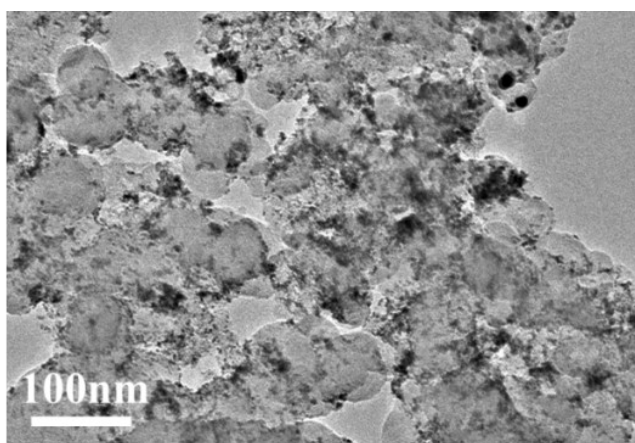

**Figure S7.** TEM image of commercial Pt/C electrocatalyst.

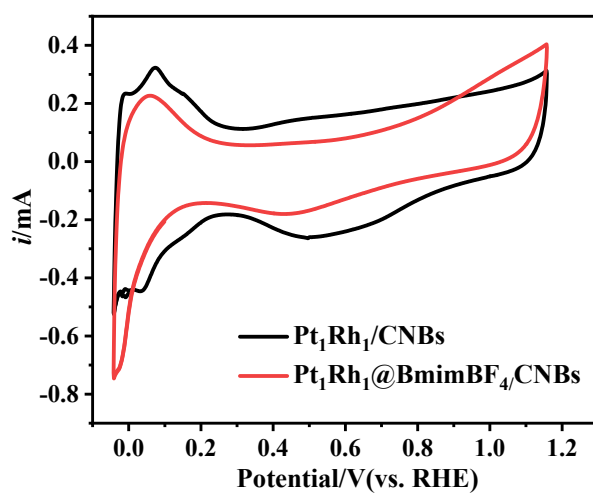

**Figure S8.** CV curves of  $\text{Pt}_1\text{Rh}_1@\text{BmimBF}_4/\text{CNBs}$  and  $\text{Pt}_1\text{Rh}_1/\text{CNBs}$  without

BmimBF<sub>4</sub> in N<sub>2</sub>-saturated 0.5 M H<sub>2</sub>SO<sub>4</sub> solutions at 50 mV s<sup>-1</sup>. Pt<sub>1</sub>Rh<sub>1</sub>/CNBs without BmimBF<sub>4</sub> were obtained by the following procedure. At first, 2 mL of 0.05 M mercaptoacetic acid solution was added into 10 mL of 1 mg mL<sup>-1</sup> Pt<sub>1</sub>Rh<sub>1</sub>@BmimBF<sub>4</sub>/CNBs suspension, and stirred for 24 h. In this process, BmimBF<sub>4</sub> molecules bound on PtRh surface were replaced by mercaptoacetic acid due to strong S-metal bond interaction. Then, the mercaptoacetic acid modified Pt<sub>1</sub>Rh<sub>1</sub>/CNBs were treated with UV/ozone (wavelength at 185 and 254 nm in air for 4 h) to remove mercaptoacetic acid. After removal of BmimBF<sub>4</sub>, ECSA of Pt<sub>1</sub>Rh<sub>1</sub>/CNBs is estimated to be 77.91 m<sup>2</sup> g<sup>-1</sup>, showing the surface coverage of BmimBF<sub>4</sub> layers on Pt<sub>1</sub>Rh<sub>1</sub>@BmimBF<sub>4</sub>/CNBs is only 19.4%.

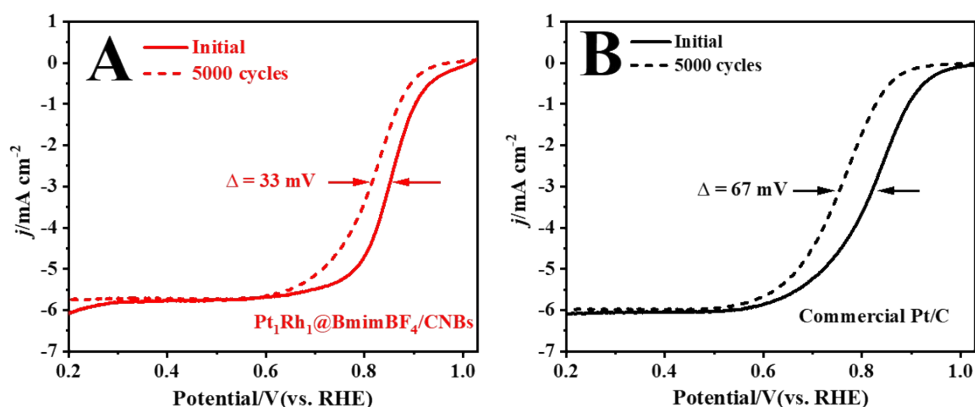

**Figure S9.** ORR polarization curves of (A) Pt<sub>1</sub>Rh<sub>1</sub>@BmimBF<sub>4</sub>/CNBs and (B) Pt/C electrocatalyst before and after accelerated durability tests O<sub>2</sub>-purged 0.5 M H<sub>2</sub>SO<sub>4</sub> electrolyte at 1600 rpm and at 5 mV s<sup>-1</sup>.

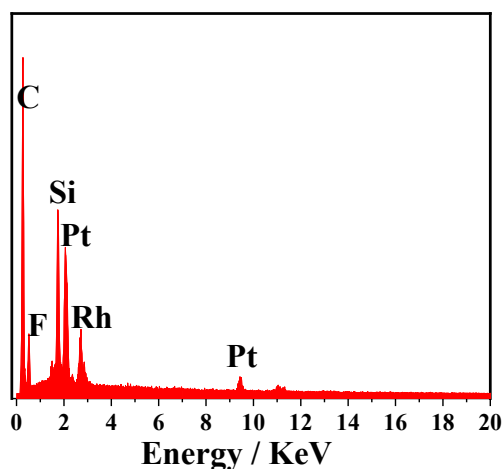

**Figure S10.** EDX spectrum Pt<sub>1</sub>Rh<sub>1</sub>@BmimBF<sub>4</sub>/CNBs after durability test.

**Table S1.** The  $E_{1/2}$  and/or  $E_{\text{onset}}$  values of ORR at various Pt-based electrocatalysts in  $\text{H}_2\text{SO}_4$  electrolyte

| Electrocatalyst                                            | electrolyte                          | $E_{1/2}$ (V) | $E_{\text{onset}}$ (V) | Ref.               |
|------------------------------------------------------------|--------------------------------------|---------------|------------------------|--------------------|
| Pt <sub>1</sub> Rh <sub>1</sub> @BmimBF <sub>4</sub> /CNBs | 0.5 M H <sub>2</sub> SO <sub>4</sub> | 0.85          | 0.99                   | This work          |
| Pt/N-doped carbon                                          | 0.5 M H <sub>2</sub> SO <sub>4</sub> | 0.88          | 0.95                   | 2021 <sup>3</sup>  |
| Pt-CeOx nanowire/C                                         | 0.5 M H <sub>2</sub> SO <sub>4</sub> | ca. 0.72      | 0.93                   | 2021 <sup>4</sup>  |
| Pt hollow tetrapods                                        | 0.5 M H <sub>2</sub> SO <sub>4</sub> | 0.83          | 1.06                   | 2021 <sup>5</sup>  |
| Pt@Ni-N-C nanocomplexes                                    | 0.5 M H <sub>2</sub> SO <sub>4</sub> | 0.85          | ca. 0.92               | 2020 <sup>6</sup>  |
| Pt/N-doped graphene                                        | 0.5 M H <sub>2</sub> SO <sub>4</sub> | 0.868         | 0.94                   | 2020 <sup>7</sup>  |
| Pt nanoparticles/carbon nanotube                           | 0.5 M H <sub>2</sub> SO <sub>4</sub> | ca. 0.66      | 0.98                   | 2020 <sup>8</sup>  |
| Pt <sub>7</sub> Y <sub>3</sub> nanoparticles               | 0.5 M H <sub>2</sub> SO <sub>4</sub> | ca. 0.56      | ca. 0.80               | 2020 <sup>9</sup>  |
| Pt/Ir/XC72                                                 | 0.5 M H <sub>2</sub> SO <sub>4</sub> | ca. 0.76      | ca. 0.88               | 2020 <sup>10</sup> |
| Pt/TiN                                                     | 0.5 M H <sub>2</sub> SO <sub>4</sub> | ca. 0.87      | ca. 0.96               | 2020 <sup>11</sup> |
| Pt/rGO+Ir/carbon nanotube                                  | 0.5 M H <sub>2</sub> SO <sub>4</sub> | ca. 0.81      | ca. 0.90               | 2020 <sup>12</sup> |
| PtRuFeCo/rGO                                               | 0.5 M H <sub>2</sub> SO <sub>4</sub> | ca. 0.75      | ca. 0.86               | 2019 <sup>13</sup> |
| Pt <sub>3</sub> Sc/carbon nanotubes                        | 0.5 M H <sub>2</sub> SO <sub>4</sub> | 0.68          | 0.89                   | 2019 <sup>14</sup> |
| Pd <sub>3</sub> Y nanoparticles                            | 0.1 M H <sub>2</sub> SO <sub>4</sub> | 0.851         | ca.0.98                | 2019 <sup>15</sup> |
| Pt-WP- graphene nanosheet                                  | 0.5 M H <sub>2</sub> SO <sub>4</sub> | 0.61          | ca. 0.85               | 2018 <sup>16</sup> |

## References

- 1 G.-R. Xu, B. Wang, J.-Y. Zhu, F.-Y. Liu, Y. Chen, J.-H. Zeng, J.-X. Jiang, Z.-H. Liu, Y.-W. Tang and J.-M. Lee, *ACS Catal.*, 2016, **6**, 5260-5267.
- 2 Q. Xue, J. Bai, C. Han, P. Chen, J.-X. Jiang and Y. Chen, *ACS Catal.*, 2018, **8**, 11287-11295.
- 3 D. Ganguly, K. Ramanujam and S. Ramaprabhu, *J. Electrochem. Soc.*, 2021, **168**, 064517.
- 4 S. Chauhan, T. Mori, T. Kobayashi, S. Yamamoto, S. Ito, G. Auchterlonie, R. Wepf, S. Ueda and F. Ye, *J. Am. Ceram. Soc.*, 2021, **104**, 1945-1952.
- 5 M. Li, A. Yang, S. Wang, Y. Wang, Q. Huang, B. Cai, X. Qiu and Y. Tang, *J. Mater. Chem. A*, 2021, **9**, 11537-11544.
- 6 X. Wang, S. Yang, Y. Yu, M. Dou, Z. Zhang and F. Wang, *Catal. Sci. Technol.*, 2020, **10**, 65-69.
- 7 C. Park, E. Lee, G. Lee and Y. Tak, *Appl. Catal. B-Environ.*, 2020, **268**, 118414.
- 8 E. A. Nagelli, F. J. Burpo, D. A. Marbach, A. N. Romero, D. J. Rabbia, H. W. Mahr, M. H. Jaskot, A. N. Murray and D. D. Chu, *J. Compos. Sci.*, 2020, **4**, 160.
- 9 Y.-C. Weng, C.-C. Wu, H.-J. Wang and Y.-Y. Wang, *Electrochim. Acta*, 2020, **340**, 136012.
- 10 D. Kaplan, M. Goor, L. Burstein, I. Popov, M. Shviro and E. Peled, *J. Solid State Electrochem.*, 2020, **24**, 2385-2393.
- 11 X. Tang, S. Zhang, J. Yu, C. Lu, Y. Chi, J. Sun, Y. Song, D. Yuan, Z. Ma and L. Zhang, *Acta*

- Phys. Chim. Sin.*, 2020, **36**, 1906070.
- 12 B. Dembinska, A. Zlotowicz, M. Modzelewska, K. Miecznikowski, I. A. Rutkowska, L. Stobinski, A. Malolepszy, M. Krzywiecki, J. Zak, E. Negro, V. Di Noto and P. J. Kulesza, *Catalysts*, 2020, **10**, 689.
  - 13 M. Rethinasabapathy, S.-M. Kang, Y. Haldorai, N. Jonna, M. Jankiraman, G.-W. Lee, S.-C. Jang, B. Natesan, C. Roh and Y. S. Huh, *J. Ind. Eng. Chem.*, 2019, **69**, 285-294.
  - 14 M. S. Garapati and R. Sundara, *Int. J. Hydrogen Energy*, 2019, **44**, 10951-10963.
  - 15 R. Brandiele, V. Amendola, A. Guadagnini, G. A. Rizzi, D. Badocco, P. Pastore, A. A. Isse, C. Durante and A. Gennaro, *Electrochim. Acta*, 2019, **320**, 134563.
  - 16 C. Zhang, Y. Dai, H. Chen, Y. Ma, B. Jing, Z. Cai, Y. Duan, B. Tang and J. Zou, *J. Mater. Chem. A*, 2018, **6**, 22636-22644.
